# Supplementary material for: A high-Tc organic-ionic phase transition crystal obtained from a trivalent cation
Source: Royal Society of Chemistry journal article supplement (doi:10.1039/d0ce01654c), 2020-11-26
Supplement: d0ce01654c1.pdf [file d0ce01654c1.pdf]

## Supporting information

### A high- $T_c$ organic-ionic phase transition crystal obtained from trivalent cation

Yu-Hua Liu,<sup>‡</sup> Jun-Chao Liu,<sup>‡</sup> Hang Peng,<sup>‡</sup> Xue-Qin Huang, Wei-Qiang Liao\* and Zhong-Xia Wang\*

#### Experiment

**Figure. S1** IR spectrum of **1**.

**Figure. S2** TGA curve of **1**.

**Figure. S3** The real part ( $\epsilon'$ ) of complex dielectric constant of **1** upon heating at 500 Hz, 1 kHz, 5 kHz, 10 kHz, 100 kHz, and 1000 kHz.

**Table S1** Bond length (Å) and bond angle (°) of **1** at 293 K.

**Table S2** Crystallographic data and structural refinement for **1**.

**Table S3** Hydrogen-bonding information of **1** at 293 K.

## Experiment

**Synthesis.** The chemical reagent was purchased and can be used directly without further purification. A large amount of colorless bulk crystals of **1** were collected by slow evaporation of an aqueous solution containing a stoichiometric ratio of the reactants.

**Differential scanning calorimetry.** Differential scanning calorimetry (DSC) measurements were performed using a NETZSCH DSC 200F3 instrument. The powder samples were placed in aluminum crucibles and measured in the temperature range between 320 K and 400 K under a nitrogen atmosphere at heating and cooling rates of 20 K min<sup>-1</sup>.

**Single-crystal X-ray diffraction measurement.** Single-crystal X-ray diffraction data of compound **1** was performed on a Rigaku Saturn 924 diffractometer with Mo-K $\alpha$  radiation ( $\lambda = 0.71073 \text{ \AA}$ ) at 293 K and 403 K. Structures of the complexes were determined by the direct methods routines in the SHELXS program and refined by full-matrix least-squares methods on F<sup>2</sup> in SHELXL.

**Powder X-ray diffraction.** Powder X-ray diffraction (PXRD) data for compound **1** from 293 K to 413 K were obtained using a Rigaku D/MAX 2000 PC X-ray diffractometer and the diffraction patterns were collected in the range of  $2\theta = 5^\circ - 40^\circ$  with a step size of  $0.02^\circ$ .

**IR spectrum and TGA measurement.** IR spectra were recorded at ambient temperature using a Shimadzu model IR-60 spectrometer with KBr pellets. TGA test for **1** at a rate of 10 K min<sup>-1</sup> in the range of 300 K-1000 K.

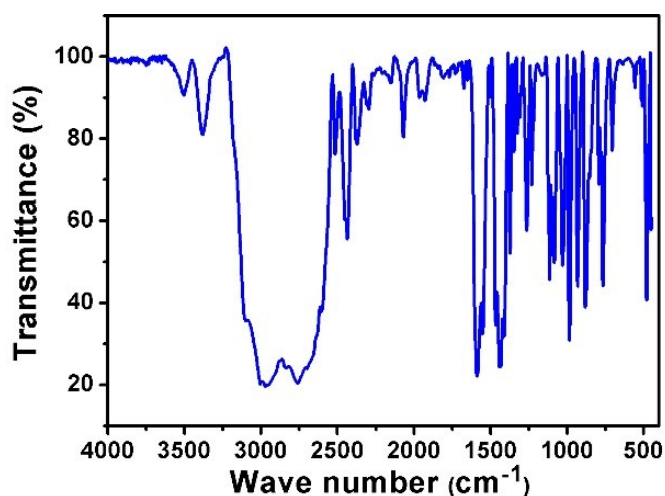

**Figure S1.** IR spectrum of **1**.

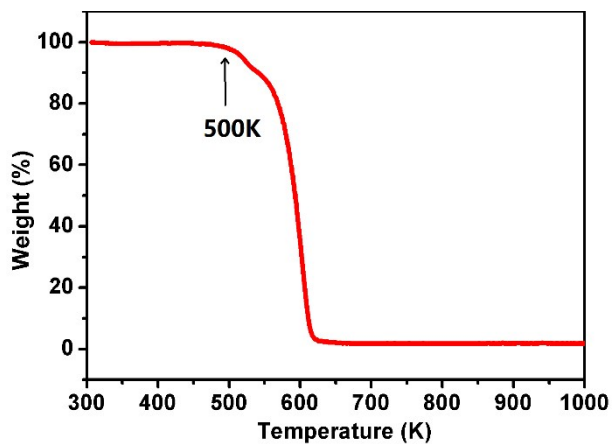

**Figure S2.** TGA curve of **1**. TGA test results showed that **1** is stable up to 500 K.

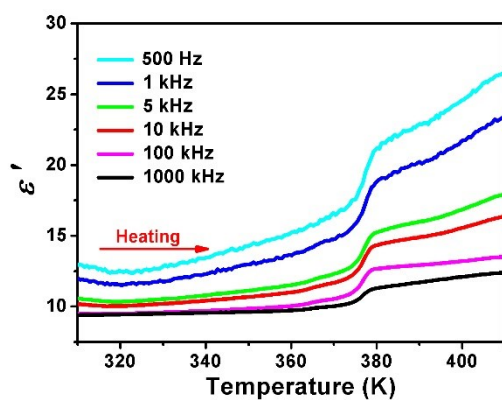

**Figure S3.** The real part ( $\epsilon'$ ) of dielectric constant of **1** during heating at 500 Hz, 1 KHz, 5 KHz, 10 KHz, 100 KHz and 1000 KHz.

**Table S1**  
length (Å)  
angle (°)  
K.

|         |          |            |            |
|---------|----------|------------|------------|
| C1-N1   | 1.497(3) | N1-C1-C2   | 117.7(2)   |
| C1-C2   | 1.511(3) | N2-C2-C1   | 114.7(2)   |
| C2-N2   | 1.499(3) | N2-C3-C4   | 115.0(2)   |
| C3-N2   | 1.494(3) | C3-C4-N3   | 113.5(2)   |
| C3-C4   | 1.499(3) | N3-C5-C6   | 116.5(2)   |
| C4-N3   | 1.509(3) | N1-C6-C5   | 117.4(2)   |
| C5-N3   | 1.491(3) | N4-C7-C8   | 116.08(19) |
| C5-C6   | 1.511(3) | C7-C8-N5   | 114.3(2)   |
| C6-N1   | 1.504(3) | N5-C9-C10  | 116.2(2)   |
| C7-N4   | 1.491(3) | N6-C10-C9  | 116.3(2)   |
| C7-C8   | 1.501(4) | N6-C11-C12 | 116.7(2)   |
| C8-N5   | 1.506(3) | N4-C12-C11 | 116.2(2)   |
| C9-N5   | 1.494(3) | C1-N1-C6   | 118.8(2)   |
| C9-C10  | 1.512(3) | C3-N2-C2   | 116.7(2)   |
| C10-N6  | 1.507(3) | C5-N3-C4   | 116.02(19) |
| C11-N6  | 1.502(3) | C7-N4-C12  | 116.2(2)   |
| C11-C12 | 1.503(3) | C9-N5-C8   | 116.32(19) |
| C12-N4  | 1.501(3) | C11-N6-C10 | 117.2(2)   |

Bond  
and bond  
of **1** at 293

**Table S2** Crystallographic data and structural refinement for **1**.

|                                                           | <b>1</b> (293 K)                                              | <b>1</b> (403 K)                                              |
|-----------------------------------------------------------|---------------------------------------------------------------|---------------------------------------------------------------|
| Formula                                                   | C <sub>6</sub> H <sub>18</sub> Cl <sub>3</sub> N <sub>3</sub> | C <sub>6</sub> H <sub>18</sub> Cl <sub>3</sub> N <sub>3</sub> |
| Formula weight                                            | 238.58                                                        | 238.58                                                        |
| Crystal system                                            | Monoclinic, <i>P</i> 2 <sub>1</sub> / <i>n</i>                | Trigonal, <i>Rm</i>                                           |
| <i>a</i> / Å                                              | 10.9842(3)                                                    | 8.0160(5)                                                     |
| <i>b</i> / Å                                              | 7.9342(2)                                                     | 8.0160(5)                                                     |
| <i>c</i> / Å                                              | 25.1271(7)                                                    | 15.1863(12)                                                   |
| <i>α</i> (deg)                                            | 90                                                            | 90                                                            |
| <i>β</i> (deg)                                            | 91.717(2)                                                     | 90                                                            |
| <i>γ</i> (deg)                                            | 90                                                            | 120                                                           |
| <i>V</i> / Å <sup>3</sup>                                 | 2188.86(10)                                                   | 845.08(12)                                                    |
| <i>Z</i> , <i>D</i> <sub>calcd</sub> / g cm <sup>-3</sup> | 8, 1.448                                                      | 3, 1.406                                                      |
| <i>F</i> (000)                                            | 1008                                                          | 378                                                           |
| Goodness-of-fit on <i>F</i> <sup>2</sup>                  | 1.001                                                         | 1.010                                                         |
| <i>R</i> <sub>1</sub> <sup>a</sup> (> 2σ)                 | 0.0508                                                        | 0.0887                                                        |
| <i>wR</i> <sub>2</sub> <sup>b</sup> (> 2σ)                | 0.1302                                                        | 0.2290                                                        |

<sup>[a]</sup>  $R_1 = \frac{\sum ||F_o| - |F_c||}{\sum |F_o|}$ , <sup>[b]</sup>  $wR^2 = [\frac{\sum (|F_o|^2 - |F_c|^2)}{\sum |F_o|^2}]^{1/2}$

**Table S3** Hydrogen-bonding information of **1** at 293 K.

| D-H...A                 | d(D-H)/Å | d(H-A)/Å | d(D-H)/Å | D-H...A/° |
|-------------------------|----------|----------|----------|-----------|
| N1-H1C-Cl5 <sup>1</sup> | 0.89     | 2.21     | 3.062(2) | 160.8     |
| N1-H1D-Cl3 <sup>1</sup> | 0.89     | 2.24     | 3.075(2) | 156.2     |
| N2-H2C-Cl4 <sup>3</sup> | 0.89     | 2.31     | 3.088(2) | 145.8     |
| N2-H2D-Cl2 <sup>2</sup> | 0.89     | 2.28     | 3.121(2) | 158.4     |
| N3-H3C-Cl1 <sup>4</sup> | 0.89     | 2.86     | 3.324(2) | 114.0     |
| N3-H3C-Cl6 <sup>1</sup> | 0.89     | 2.52     | 3.209(2) | 134.3     |
| N3-H3D-Cl2 <sup>2</sup> | 0.89     | 2.27     | 3.153(2) | 170.2     |
| N4-H4C-Cl6 <sup>6</sup> | 0.89     | 2.29     | 3.120(2) | 155.4     |
| N4-H4D-Cl1 <sup>5</sup> | 0.89     | 2.31     | 3.099(2) | 147.1     |
| N5-H5C-Cl5 <sup>9</sup> | 0.89     | 2.71     | 3.285(2) | 123.9     |
| N5-H5C-Cl6              | 0.89     | 2.77     | 3.380(2) | 127.0     |
| N5-H5D-Cl1 <sup>5</sup> | 0.89     | 2.30     | 3.170(2) | 166.6     |
| N6-H6C-Cl3 <sup>7</sup> | 0.89     | 2.27     | 3.119(2) | 159.7     |
| N6-H6D-Cl2              | 0.89     | 2.28     | 3.132(2) | 161.3     |

<sup>1</sup>1/2-X,-1/2+Y,1/2-Z; <sup>2</sup>-1+X,+Y,+Z; <sup>3</sup>1/2-X,1/2+Y,1/2-Z; <sup>4</sup>1-X,1-Y,1-Z; <sup>5</sup>3/2-X,-1/2+Y,1/2-Z; <sup>6</sup>+X,-1+Y,+Z; <sup>7</sup>1+X,+Y,+Z;
